# Supplementary material for: Proteomics, toxicity and antivenom neutralization of Sri Lankan and Indian Russell’s viper (Daboia russelii) venoms
Source: PubMed Central journal article supplement (PMC8092856; doi:10.1590/1678-9199-jvatitd-2020-0177), 2021-04-30
Supplement: 1678-9199-jvatitd-27-e20200177-s1.pdf [file 1678-9199-jvatitd-27-e20200177-s1.pdf]

## Supplementary Material to “Proteomics, toxicity and antivenom neutralization of Sri Lankan and Indian Russell’s viper (*Daboia russelii*) venoms”

**Additional file 1.** Protein assignment of Sri Lankan *Daboia russelii* (DrSL) venom by fractions of reversed-phase HPLC. Data were generated from ESI-LCMS/MC analysis of in-solution digested peptides.

| Fraction | Protein designated ID | Protein name*                                             | Database accession/species name             | Protein score | Distinct peptides matched (#) | Relative abundance (%) |
|----------|-----------------------|-----------------------------------------------------------|---------------------------------------------|---------------|-------------------------------|------------------------|
| 1        | <i>DrSL1</i>          | Snake venom metalloprotease inhibitor precursor           | CL1276.Contig 1_DRSL ( <i>D. russelii</i> ) | 31.19         | 2                             | 1.69%                  |
| 2        | <i>DrSL2</i>          | Kunitz-type serine protease inhibitor 3                   | Q2ES48 ( <i>D. russelii</i> )               | 84.81         | 4                             | 1.43%                  |
|          | <i>DrSL1</i>          | Snake venom metalloprotease inhibitor precursor           | CL1276.Contig 1_DRSL ( <i>D. russelii</i> ) | 43.86         | 3                             | 0.66%                  |
|          | <i>DrSL3</i>          | Disintegrin trigramin-gamma                               | P62383 ( <i>T. gramineus</i> )              | 36.9          | 2                             | 0.05%                  |
| 3        | <i>DrSL2</i>          | Kunitz-type serine protease inhibitor 3                   | Q2ES48 ( <i>D. russelii</i> )               | 140.09        | 8                             | 1.54%                  |
|          | <i>DrSL4</i>          | Basic phospholipase A2 VRV-PL-VIIIa                       | P59071 ( <i>D. russelii</i> )               | 109.01        | 6                             | 1.06%                  |
|          | <i>DrSL5</i>          | U1-viperitoxin-Dr1a                                       | P86368 ( <i>D. russelii</i> )               | 92.22         | 5                             | 1.56%                  |
|          | <i>DrSL6</i>          | Factor X activator heavy chain                            | K9JAW0 ( <i>D. russelii</i> )               | 34.91         | 2                             | 0.04%                  |
| 4        | <i>DrSL5</i>          | U1-viperitoxin-Dr1a                                       | P86368 ( <i>D. russelii</i> )               | 50.46         | 3                             | 0.35%                  |
|          | <i>DrSL4</i>          | Basic phospholipase A2 VRV-PL-VIIIa                       | P59071 ( <i>D. russelii</i> )               | 49.59         | 3                             | 0.35%                  |
|          | <i>DrSL7</i>          | Zinc metalloproteinase-disintegrin-like VLAIP-A           | Q4VM08 ( <i>M. lebetina</i> )               | 26.96         | 3                             | 0.42%                  |
|          | <i>DrSL8</i>          | DSAIP                                                     | A0A2H4Z2Y9 ( <i>D. siamensis</i> )          | 39.1          | 3                             | 0.41%                  |
|          | <i>DrSL9</i>          | Venom nerve growth factor                                 | P30894 ( <i>D. russelii</i> )               | 28.91         | 2                             | 0.90%                  |
| 5        | <i>DrSL4</i>          | Basic phospholipase A2 VRV-PL-VIIIa                       | P59071 ( <i>D. russelii</i> )               | 117.4         | 6                             | 0.20%                  |
|          | <i>DrSL4</i>          | Basic phospholipase A2 VRV-PL-VIIIa                       | B3RF18 ( <i>D. russelii</i> )               | 92.43         | 5                             | 0.15%                  |
|          | <i>DrSL10</i>         | Snake venom vascular endothelial growth factor toxin VR-1 | P67861 ( <i>D. russelii</i> )               | 105.67        | 6                             | 2.16%                  |
|          | <i>DrSL11</i>         | Basic phospholipase A2 homolog Tpu-K49b                   | Q2YHJ8 ( <i>T. puniceus</i> )               | 73.5          | 4                             | 0.16%                  |
|          | <i>DrSL2</i>          | Kunitz-type serine protease inhibitor 3                   | Q2ES48 ( <i>D. russelii</i> )               | 39.66         | 2                             | 0.06%                  |
|          | <i>DrSL9</i>          | Venom nerve growth factor                                 | P30894 ( <i>D. russelii</i> )               | 38.69         | 2                             | 0.08%                  |
| 6        | <i>DrSL4</i>          | Basic phospholipase A2 VRV-PL-VIIIa                       | P59071 ( <i>D. russelii</i> )               | 266.23        | 14                            | 16.50%                 |

| Fraction | Protein designated ID | Protein name*                                     | Database accession/<br>species name         | Protein score | Distinct peptides matched (#) | Relative abundance (%) |
|----------|-----------------------|---------------------------------------------------|---------------------------------------------|---------------|-------------------------------|------------------------|
|          | <i>DrSL5</i>          | U1-viperitoxin-Dr1a                               | P86368 ( <i>D. russelii</i> )               | 97.79         | 5                             | 10.92%                 |
|          | <i>DrSL12</i>         | Cysteine-rich secretory protein Dr-CRPK           | CL3658.Contig 2_DRSL ( <i>D. russelii</i> ) | 61.64         | 4                             | 4.92%                  |
|          | <i>DrSL13</i>         | Cysteine rich secretory protein                   | ASU45033 ( <i>D. russelii</i> )             | 32.19         | 2                             | 1.05%                  |
|          | <i>DrSL14</i>         | Beta-fibrinogenase-like                           | E5L0E4 ( <i>D. siamensis</i> )              | 30.93         | 2                             | 0.0007%                |
|          | <i>DrSL15</i>         | Venom serine proteinase-like protein 2            | Q9PT40 ( <i>M. lebetina</i> )               | 30.49         | 2                             | 1.09%                  |
| 7        | <i>DrSL16</i>         | RVV-V gamma-like protein precursor                | P18965 ( <i>D. siamensis</i> )              | 87.4          | 9                             | 0.64%                  |
|          | <i>DrSL16</i>         | RVV-V gamma-like protein precursor                | P18965 ( <i>D. siamensis</i> )              | 125.6         | 8                             | 1.30%                  |
|          | <i>DrSL17</i>         | Serine beta-fibrinogenase-like protein precursor  | CL2958.Contig 1_DRSL ( <i>D. russelii</i> ) | 69.44         | 4                             | 0.38%                  |
|          | <i>DrSL17</i>         | Serine beta-fibrinogenase-like protein precursor  | CL2958.Contig 7_DRSL ( <i>D. russelii</i> ) | 103.42        | 7                             | 1.48%                  |
|          | <i>DrSL5</i>          | U1-viperitoxin-Dr1a                               | P86368 ( <i>D. russelii</i> )               | 117.19        | 7                             | 0.79%                  |
|          | <i>DrSL4</i>          | Basic phospholipase A2 VRV-PL-VIIIa               | P59071 ( <i>D. russelii</i> )               | 98.32         | 6                             | 1.89%                  |
|          | <i>DrSL18</i>         | Serine alpha-fibrinogenase-like protein precursor | E5L0E3 ( <i>D. siamensis</i> )              | 52.66         | 3                             | 0.18%                  |
|          | <i>DrSL19</i>         | L-amino-acid oxidase                              | G8XQX1 ( <i>D. russelii</i> )               | 44.69         | 3                             | 0.04%                  |
|          | <i>DrSL20</i>         | L-amino-acid oxidase                              | CL1662.Contig 1_DRSL ( <i>D. russelii</i> ) | 42.69         | 3                             | 0.04%                  |
|          | <i>DrSL15</i>         | Venom serine proteinase-like protein 2            | Q9PT40 ( <i>M. lebetina</i> )               | 29.76         | 2                             | 0.11%                  |
| 8        | <i>DrSL4</i>          | Basic phospholipase A2 VRV-PL-VIIIa               | P59071 ( <i>D. russelii</i> )               | 174.19        | 10                            | 1.01%                  |
|          | <i>DrSL21</i>         | Basic phospholipase A2 DsM-S1                     | A8CG84 ( <i>D. siamensis</i> )              | 168.55        | 9                             | 0.99%                  |
|          | <i>DrSL5</i>          | U1-viperitoxin-Dr1a                               | P86368 ( <i>D. russelii</i> )               | 160.33        | 9                             | 0.84%                  |
|          | <i>DrSL17</i>         | Serine beta-fibrinogenase-like protein precursor  | CL2958.Contig 7_DRSL ( <i>D. russelii</i> ) | 65.14         | 4                             | 0.11%                  |
|          | <i>DrSL22</i>         | Serine beta-fibrinogenase-like protein precursor  | E5L0E4 ( <i>D. siamensis</i> )              | 49.06         | 3                             | 0.11%                  |
| 9        | <i>DrSL19</i>         | L-amino-acid oxidase                              | G8XQX1 ( <i>D. russelii</i> )               | 31.29         | 2                             | 0.02%                  |
|          | <i>DrSL4</i>          | Basic phospholipase A2 VRV-PL-VIIIa               | P59071 ( <i>D. russelii</i> )               | 158.2         | 9                             | 5.89%                  |
| 10       | <i>DrSL5</i>          | U1-viperitoxin-Dr1a                               | P86368 ( <i>D. russelii</i> )               | 157.03        | 8                             | 1.17%                  |
|          | <i>DrSL23</i>         | Factor X activator heavy chain                    | Unigene32626_DRSL ( <i>D. russelii</i> )    | 199.63        | 11                            | 0.25%                  |
|          | <i>DrSL5</i>          | U1-viperitoxin-Dr1a                               | P86368 ( <i>D. russelii</i> )               | 173.02        | 9                             | 6.25%                  |
|          | <i>DrSL21</i>         | Basic phospholipase A2 DsM-S1                     | A8CG84 ( <i>D. siamensis</i> )              | 158.63        | 8                             | 6.27%                  |

| Fraction | Protein designated ID | Protein name*                                      | Database accession/<br>species name         | Protein score | Distinct peptides matched (#) | Relative abundance (%) |
|----------|-----------------------|----------------------------------------------------|---------------------------------------------|---------------|-------------------------------|------------------------|
|          | <i>DrSL4</i>          | Basic phospholipase A2 VRV-PL-VIIIa                | P59071 ( <i>D. russelii</i> )               | 156.01        | 8                             | 5.25%                  |
|          | <i>DrSL24</i>         | Dabocetin alpha subunit                            | K9JBU0 ( <i>D. russelii</i> )               | 58.22         | 4                             | 0.13%                  |
|          | <i>DrSL17</i>         | Serine beta-fibrinogenase-like protein precursor   | CL2958.Contig 7_DRSL ( <i>D. russelii</i> ) | 25.55         | 2                             | 0.06%                  |
| 11       | <i>DrSL23</i>         | Factor X activator heavy chain                     | Unigene32626_DRSL ( <i>D. russelii</i> )    | 279.41        | 15                            | 0.47%                  |
|          | <i>DrSL4</i>          | Basic phospholipase A2 VRV-PL-VIIIa                | P59071 ( <i>D. russelii</i> )               | 128.36        | 7                             | 0.45%                  |
|          | <i>DrSL5</i>          | U1-viperitoxin-Dr1a                                | P86368 ( <i>D. russelii</i> )               | 102.47        | 5                             | 0.41%                  |
|          | <i>DrSL24</i>         | Dabocetin alpha subunit                            | K9JBU0 ( <i>D. russelii</i> )               | 93.84         | 6                             | 0.23%                  |
|          | <i>DrSL25</i>         | Dabocetin beta subunit                             | Unigene3920_DRSL ( <i>D. russelii</i> )     | 64.3          | 5                             | 0.47%                  |
|          | <i>DrSL26</i>         | C-type lectin A12                                  | Unigene30367_DRSL ( <i>D. russelii</i> )    | 62.98         | 4                             | 0.09%                  |
|          | <i>DrSL27</i>         | Coagulation factor X activating enzyme light chain | Q4PRD1 ( <i>D. russelii</i> )               | 40.19         | 2                             | 0.09%                  |
|          | <i>DrSL28</i>         | Factor X activator light chain 2                   | Q4PRD2 ( <i>D. siamensis</i> )              | 35.48         | 2                             | 0.23%                  |
|          | <i>DrSL17</i>         | Serine beta-fibrinogenase-like protein precursor   | CL2958.Contig 7_DRSL ( <i>D. russelii</i> ) | 35.06         | 2                             | 0.02%                  |
|          | <i>DrSL29</i>         | L-amino acid oxidase                               | CL4302.Contig 1_TA ( <i>T. albolabris</i> ) | 28.17         | 2                             | 0.05%                  |
|          | <i>DrSL30</i>         | 5'-nucleotidase                                    | W8EFS0 ( <i>M. lebetina</i> )               | 27.71         | 2                             | 0.01%                  |
| 12       | <i>DrSL23</i>         | Factor X activator heavy chain                     | Unigene32626_DRSL ( <i>D. russelii</i> )    | 289.75        | 16                            | 0.64%                  |
|          | <i>DrSL31</i>         | Zinc metalloproteinase-disintegrin HV1             | Unigene3635 ( <i>T. purpureomaculatus</i> ) | 48.53         | 3                             | 0.24%                  |
|          | <i>DrSL21</i>         | Basic phospholipase A2 DsM-S1                      | A8CG84 ( <i>D. siamensis</i> )              | 174.82        | 11                            | 0.29%                  |
|          | <i>DrSL4</i>          | Basic phospholipase A2 VRV-PL-VIIIa                | P59071 ( <i>D. russelii</i> )               | 167.76        | 10                            | 0.30%                  |
|          | <i>DrSL5</i>          | U1-viperitoxin-Dr1a                                | P86368 ( <i>D. russelii</i> )               | 97.87         | 5                             | 0.24%                  |
|          | <i>DrSL32</i>         | Snaclec dabocetin subunit alpha                    | Q38L02 ( <i>D. siamensis</i> )              | 68.06         | 6                             | 0.14%                  |
|          | <i>DrSL28</i>         | Factor X activator light chain 2                   | Q4PRD2 ( <i>D. siamensis</i> )              | 52.33         | 3                             | 0.45%                  |
|          | <i>DrSL27</i>         | Coagulation factor X activating enzyme light chain | Q4PRD1 ( <i>D. russelii</i> )               | 40.97         | 2                             | 0.34%                  |
|          | <i>DrSL26</i>         | C-type lectin A12                                  | Unigene30367_DRSL ( <i>D. russelii</i> )    | 34.24         | 2                             | 0.07%                  |
|          | <i>DrSL29</i>         | L-amino acid oxidase                               | CL4302.Contig 1_TA ( <i>T. albolabris</i> ) | 32.62         | 2                             | 0.04%                  |

| Fraction | Protein designated ID | Protein name*                                                                                                                                     | Database accession/ species name                   | Protein score | Distinct peptides matched (#) | Relative abundance (%) |
|----------|-----------------------|---------------------------------------------------------------------------------------------------------------------------------------------------|----------------------------------------------------|---------------|-------------------------------|------------------------|
|          | <i>DrSL25</i>         | Dabocetin beta subunit                                                                                                                            | Unigene920_D RSL ( <i>D. russelii</i> )            | 31.97         | 2                             | 0.15%                  |
| 13       | <i>DrSL23</i>         | Factor X activator heavy chain                                                                                                                    | Unigene32626 _DRSL ( <i>D. russelii</i> )          | 212.98        | 12                            | 1.19%                  |
|          | <i>DrSL31</i>         | Zinc metalloproteinase-disintegrin HV1                                                                                                            | Unigene3635_ TP ( <i>T. purpureomaculatus</i> )    | 96.26         | 6                             | 0.95%                  |
|          | <i>DrSL33</i>         | Zinc metalloproteinase-disintegrin ACLD                                                                                                           | CL9202.Contig 4_TA ( <i>T. albolabris</i> )        | 40.38         | 2                             | 0.24%                  |
|          | <i>DrSL34</i>         | Zinc metalloproteinase-disintegrin-like VMP-III                                                                                                   | C9E1S0 ( <i>A. leucostoma</i> )                    | 33.92         | 2                             | 2.19%                  |
|          | <i>DrSL30</i>         | 5'-nucleotidase                                                                                                                                   | W8EFS0 ( <i>M. lebetina</i> )                      | 202.4         | 12                            | 0.43%                  |
|          | <i>DrSL35</i>         | Phosphodiesterase 1                                                                                                                               | CL3655.Contig 2_CA ( <i>C. adamanteus</i> )        | 130.36        | 8                             | 0.21%                  |
|          | <i>DrSL20</i>         | L-amino-acid oxidase                                                                                                                              | CL1662.Contig 1_DRSL ( <i>D. russelii</i> )        | 124.06        | 8                             | 0.85%                  |
|          | <i>DrSL36</i>         | L-amino-acid oxidase                                                                                                                              | Q4F867 ( <i>D. siamensis</i> )                     | 83.52         | 5                             | 1.22%                  |
|          | <i>DrSL37</i>         | Chain A, Amine Oxidase                                                                                                                            | Q6TGG8 ( <i>B. moojeni</i> )                       | 32.53         | 2                             | 0.60%                  |
|          | <i>DrSL4</i>          | Basic phospholipase A2 VRV-PL-VIIIa                                                                                                               | P59071 ( <i>D. russelii</i> )                      | 68.52         | 5                             | 0.41%                  |
|          | <i>DrSL27</i>         | Coagulation factor X activating enzyme light chain, RVV-X-light chain, LC1=metalloproteinase with disintegrin-like and C-type lectin-like domains | Q4PRD1 ( <i>D. russelii</i> )                      | 35.72         | 2                             | 0.40%                  |
|          | <i>DrSL38</i>         | Snaclec 4                                                                                                                                         | Q4PRC9 ( <i>D. siamensis</i> )                     | 30.29         | 2                             | 0.26%                  |
|          | <i>DrSL5</i>          | U1-viperitoxin-Dr1a                                                                                                                               | P86368 ( <i>D. siamensis</i> )                     | 33.98         | 2                             | 0.26%                  |
|          | <i>DrSL39</i>         | P68 alpha subunit                                                                                                                                 | K9JDF2 ( <i>D. siamensis</i> )                     | 30.63         | 2                             | 0.13%                  |
|          | <i>DrSL28</i>         | Factor X activator light chain 2                                                                                                                  | Q4PRD2 ( <i>D. siamensis</i> )                     | 28.83         | 2                             | 2.05%                  |
|          | <i>DrSL40</i>         | xaa-Pro aminopeptidase 2                                                                                                                          | Unigene19296 _EC ( <i>E. carinatus</i> )           | 28.31         | 2                             | 0.05%                  |
|          | <i>DrSL41</i>         | Zinc metalloproteinase-disintegrin stejnihagin-B                                                                                                  | CL4568.Contig 1_TP ( <i>T. purpureomaculatus</i> ) | 26.79         | 2                             | 0.13%                  |
|          | <i>DrSL42</i>         | Zinc metalloproteinase-disintegrin jerdonitin                                                                                                     | A0A194ARM6 ( <i>P. mucrosquamatus</i> )            | 25.04         | 2                             | 0.14%                  |

*B. moojeni*: *Bothrops moojeni*; *C. adamanteus*: *Crotalus adamanteus*; *D. russelii*: *Daboia russelii*; *D. siamensis*: *Daboia siamensis*; *E. carinatus*: *Echis carinatus*; *M. lebetina*: *Macrovipera lebetina*; *P. mucrosquamatus*: *Protobothrops mucrosquamatus*; *T. albolabris*: *Trimeresurus albolabris*; *T. gramineus*: *Trimeresurus gramineus*; *T. puniceus*: *Trimeresurus puniceus*; *T. purpureomaculatus*: *Trimeresurus purpureomaculatus*.

\*Protein names taken from protein sequence database based on homology match in BLAST and UniProt search.

Peptide sequences and mass/charge ratios of all corresponding proteins are shown in Additional file 3.

#Number of distinct peptides matched to identified proteins.
