# Supplementary material for: Proteomics, toxicity and antivenom neutralization of Sri Lankan and Indian Russell’s viper (Daboia russelii) venoms
Source: PubMed Central journal article supplement (PMC8092856; doi:10.1590/1678-9199-jvatitd-2020-0177), 2021-04-30
Supplement: 1678-9199-jvatitd-27-e20200177-s2.pdf [file 1678-9199-jvatitd-27-e20200177-s2.pdf]

## Supplementary Material to “Proteomics, toxicity and antivenom neutralization of Sri Lankan and Indian Russell’s viper (*Daboia russelii*) venoms”

**Additional file 2.** Protein assignment of Indian *Daboia russelii* (DrI) venom by fractions of reversed-phase HPLC. Data were generated from ESI-LCMS/MC analysis of in-solution digested peptides.

| Fraction | Protein designated ID | Protein name*                                             | Database accession/ species name         | Protein score | Distinct peptides matched (#) | Relative abundance (%) |
|----------|-----------------------|-----------------------------------------------------------|------------------------------------------|---------------|-------------------------------|------------------------|
| 1        | <i>Drl1</i>           | Kunitz-type protease inhibitor                            | H9BFA3 ( <i>D. russelii</i> )            | 36.21         | 2                             | 2.69%                  |
|          | <i>Drl2</i>           | Disintegrin jerdostatin                                   | Q7ZZM2 ( <i>P. jerdonii</i> )            | 33.13         | 2                             | 0.32%                  |
| 2        | <i>Drl3</i>           | Kunitz-type serine protease inhibitor B5                  | A8Y7P5 ( <i>D. siamensis</i> )           | 74.66         | 4                             | 0.82%                  |
|          | <i>Drl1</i>           | Kunitz-type protease inhibitor                            | H9BFA3 ( <i>D. russelii</i> )            | 63.84         | 3                             | 1.82%                  |
|          | <i>Drl4</i>           | Basic phospholipase A2 VRV-PL-VIIIa                       | P59071 ( <i>D. russelii</i> )            | 44.82         | 3                             | 0.12%                  |
| 3        | <i>Drl5</i>           | DSAIP                                                     | A0A2H4Z2X4 ( <i>D. siamensis</i> )       | 105.35        | 6                             | 0.05%                  |
|          | <i>Drl6</i>           | Venom nerve growth factor                                 | P30894 ( <i>D. russelii</i> )            | 65.08         | 4                             | 0.05%                  |
|          | <i>Drl7</i>           | U1-viperitoxin-Dr1a                                       | P86368 ( <i>D. russelii</i> )            | 58.98         | 3                             | 0.17%                  |
|          | <i>Drl4</i>           | Basic phospholipase A2 VRV-PL-VIIIa                       | P59071 ( <i>D. russelii</i> )            | 53.59         | 3                             | 0.17%                  |
|          | <i>Drl1</i>           | Kunitz-type protease inhibitor                            | H9BFA3 ( <i>D. russelii</i> )            | 51.22         | 3                             | 0.03%                  |
| 4        | <i>Drl5</i>           | DSAIP                                                     | A0A2H4Z2X4 ( <i>D. siamensis</i> )       | 110.67        | 6                             | 0.14%                  |
|          | <i>Drl6</i>           | Venom nerve growth factor                                 | P30894 ( <i>D. russelii</i> )            | 94.43         | 6                             | 0.61%                  |
|          | <i>Drl7</i>           | U1-viperitoxin-Dr1a                                       | P86368 ( <i>D. russelii</i> )            | 55.94         | 3                             | 0.16%                  |
|          | <i>Drl8</i>           | Kunitz-type serine protease inhibitor C4                  | A8Y7N7 ( <i>D. siamensis</i> )           | 37.41         | 2                             | 0.06%                  |
|          | <i>Drl9</i>           | L-amino-acid oxidase                                      | G8XQX1 ( <i>D. russelii</i> )            | 34.06         | 2                             | 0.04%                  |
| 5        | <i>Drl10</i>          | Snake venom vascular endothelial growth factor toxin VR-1 | P67861 ( <i>D. russelii</i> )            | 62.27         | 4                             | 1.21%                  |
|          | <i>Drl11</i>          | Snake venom vascular endothelial growth factor toxin OS   | Unigene30051_DRSL ( <i>D. russelii</i> ) | 60.28         | 4                             | 0.31%                  |
|          | <i>Drl6</i>           | Venom nerve growth factor                                 | P30894 ( <i>D. russelii</i> )            | 59.86         | 3                             | 1.02%                  |
|          | <i>Drl4</i>           | Basic phospholipase A2 VRV-PL-VIIIa                       | P59071 ( <i>D. russelii</i> )            | 52.57         | 3                             | 0.06%                  |

| Fraction | Protein designated ID | Protein name*                                    | Database accession/<br>species name               | Protein score | Distinct peptides matched (#) | Relative abundance (%) |
|----------|-----------------------|--------------------------------------------------|---------------------------------------------------|---------------|-------------------------------|------------------------|
| 6        | <i>Drl4</i>           | Basic phospholipase A2 VRV-PL-VIIIa              | P59071 ( <i>D. russelii</i> )                     | 270.65        | 13                            | 21.35%                 |
|          | <i>Drl7</i>           | U1-viperitoxin-Dr1a                              | P86368 ( <i>D. russelii</i> )                     | 197.49        | 11                            | 1.76%                  |
|          | <i>Drl12</i>          | Beta-fibrinogenase-like                          | E5L0E4 ( <i>D. siamensis</i> )                    | 76.87         | 5                             | 5.49%                  |
|          | <i>Drl13</i>          | Cysteine-rich secretory protein Dr-CRPK          | CL3658.Cont<br>ig2_DRSL<br>( <i>D. russelii</i> ) | 62.11         | 4                             | 1.91%                  |
|          | <i>Drl14</i>          | Venom serine proteinase-like protein 2           | Q9PT40 ( <i>M. lebetina</i> )                     | 49.74         | 2                             | 2.69%                  |
|          | <i>Drl15</i>          | Acidic phospholipase A2 RV-7                     | P31100 ( <i>D. siamensis</i> )                    | 42.59         | 2                             | 3.01%                  |
|          | <i>Drl16</i>          | Basic phospholipase A2 RVV-VD                    | P81458 ( <i>D. russelii</i> )                     | 30.85         | 2                             | 0.99%                  |
| 7        | <i>Drl17</i>          | Cysteine-rich secretory protein Dr-CRPK          | F2Q6F2 ( <i>D. russelii</i> )                     | 195.2         | 11                            | 0.89%                  |
|          | <i>Drl13</i>          | Cysteine-rich secretory protein Dr-CRPK          | CL3658.Cont<br>ig2_DRSL<br>( <i>D. russelii</i> ) | 187.5         | 11                            | 0.85%                  |
|          | <i>Drl18</i>          | Cysteine-rich secretory protein Da-CRPa          | F2Q6G0 ( <i>D. acutus</i> )                       | 133.34        | 6                             | 0.98%                  |
|          | <i>Drl19</i>          | Cysteine-rich secretory protein Pg-CRP           | F2Q6F6 ( <i>C. godmani</i> )                      | 36.36         | 2                             | 0.23%                  |
|          | <i>Drl14</i>          | Venom serine proteinase-like protein 2           | Q9PT40 ( <i>M. lebetina</i> )                     | 76.03         | 5                             | 0.28%                  |
|          | <i>Drl12</i>          | Beta-fibrinogenase-like                          | E5L0E4 ( <i>D. siamensis</i> )                    | 64.33         | 4                             | 0.47%                  |
|          | <i>Drl4</i>           | Basic phospholipase A2 VRV-PL-VIIIa              | P59071 ( <i>D. russelii</i> )                     | 153.85        | 8                             | 0.88%                  |
|          | <i>Drl4</i>           | Basic phospholipase A2 VRV-PL-VIIIa              | P59071 ( <i>D. russelii</i> )                     | 133.58        | 7                             | 0.63%                  |
|          | <i>Drl20</i>          | Basic phospholipase A2 DsM-S1                    | A8CG84 ( <i>D. siamensis</i> )                    | 132.6         | 7                             | 0.94%                  |
|          | <i>Drl7</i>           | U1-viperitoxin-Dr1a                              | P86368 ( <i>D. russelii</i> )                     | 70.77         | 4                             | 1.62%                  |
| 8        | <i>Drl21</i>          | Factor V activator RVV-V gamma                   | P18965 ( <i>D. siamensis</i> )                    | 231.54        | 15                            | 0.23%                  |
|          | <i>Drl12</i>          | Beta-fibrinogenase-like                          | E5L0E4 ( <i>D. siamensis</i> )                    | 70.84         | 5                             | 0.28%                  |
|          | <i>Drl22</i>          | Serine beta-fibrinogenase-like protein precursor | CL2958.Cont<br>ig2_DRSL<br>( <i>D. russelii</i> ) | 64.65         | 4                             | 0.03%                  |
|          | <i>Drl23</i>          | Thrombin-like enzyme                             | Q98TT5 ( <i>D. acutus</i> )                       | 27.01         | 2                             | 0.01%                  |
|          | <i>Drl4</i>           | Basic phospholipase A2 VRV-PL-VIIIa              | P59071 ( <i>D. russelii</i> )                     | 216.86        | 12                            | 0.40%                  |
|          | <i>Drl4</i>           | Basic phospholipase A2 VRV-PL-VIIIa              | P59071 ( <i>D. russelii</i> )                     | 188.63        | 10                            | 0.24%                  |
|          | <i>Drl7</i>           | U1-viperitoxin-Dr1a                              | P86368 ( <i>D. russelii</i> )                     | 104.59        | 5                             | 0.12%                  |
|          | <i>Drl17</i>          | Cysteine-rich secretory protein Dr-CRPK          | F2Q6F2 ( <i>D. russelii</i> )                     | 126.16        | 8                             | 0.03%                  |
|          | <i>Drl13</i>          | Cysteine-rich secretory protein Dr-CRPK          | CL3658.Cont<br>ig2_DRSL<br>( <i>D. russelii</i> ) | 107.49        | 7                             | 0.03%                  |
|          | <i>Drl24</i>          | Cysteine-rich secretory protein Dr-CRPB          | F2Q6F3 ( <i>D. russelii</i> )                     | 34.11         | 2                             | 0.04%                  |

| Fraction | Protein designated ID | Protein name*                                                     | Database accession/species name            | Protein score | Distinct peptides matched (#) | Relative abundance (%) |
|----------|-----------------------|-------------------------------------------------------------------|--------------------------------------------|---------------|-------------------------------|------------------------|
|          | <i>Drl19</i>          | Cysteine-rich secretory protein Pg-CRP                            | F2Q6F6 ( <i>C. godmani</i> )               | 26.88         | 2                             | 0.01%                  |
|          | <i>Drl15</i>          | Acidic phospholipase A2 RV-7                                      | B3RF16 ( <i>D. siamensis</i> )             | 104.66        | 5                             | 0.13%                  |
|          | <i>Drl14</i>          | Venom serine proteinase-like protein 2                            | Q9PT40 ( <i>M. lebetina</i> )              | 90.68         | 5                             | 0.02%                  |
|          | <i>Drl25</i>          | Serine protease VLSP-3                                            | E0Y420 ( <i>M. lebetina</i> )              | 59.9          | 4                             | 0.03%                  |
|          | <i>Drl26</i>          | Beta-fibrinogenase                                                | E0Y419 ( <i>M. lebetina</i> )              | 48.23         | 3                             | 0.03%                  |
| 9        | <i>Drl27</i>          | Serine protease VLSP-1                                            | CL2958.Contig2_DRSL ( <i>D. russelii</i> ) | 98.7          | 4                             | 1.20%                  |
|          | <i>Drl4</i>           | Basic phospholipase A2 VRV-PL-VIIIa                               | P59071 ( <i>D. russelii</i> )              | 157.24        | 8                             | 0.24%                  |
|          | <i>Drl7</i>           | U1-viperitoxin-Dr1a                                               | P86368 ( <i>D. russelii</i> )              | 106.22        | 6                             | 0.10%                  |
|          | <i>Drl28</i>          | Alpha-fibrinogenase-like                                          | E5L0E3 ( <i>D. siamensis</i> )             | 140.35        | 9                             | 0.49%                  |
|          | <i>Drl29</i>          | Serine alpha-fibrinogenase-like protein precursor Daboia-russelii | E5L0E3 ( <i>D. siamensis</i> )             | 94.96         | 6                             | 0.36%                  |
|          | <i>Drl12</i>          | Beta-fibrinogenase-like                                           | E5L0E4 ( <i>D. siamensis</i> )             | 30.56         | 2                             | 0.14%                  |
|          | <i>Drl30</i>          | Serine protease                                                   | CL2791.Contig2_EC ( <i>E. carinatus</i> )  | 27.92         | 2                             | 0.09%                  |
|          | <i>Drl10</i>          | Snake venom vascular endothelial growth factor toxin VR-1         | P67861 ( <i>D. russelii</i> )              | 29.83         | 2                             | 0.02%                  |
|          | <i>Drl16</i>          | Basic phospholipase A2 RVV-VD                                     | P81458 ( <i>D. russelii</i> )              | 28.42         | 2                             | 0.04%                  |
| 10       | <i>Drl4</i>           | Basic phospholipase A2 VRV-PL-VIIIa                               | P59071 ( <i>D. russelii</i> )              | 71.35         | 4                             | 1.35%                  |
| 11       | <i>Drl4</i>           | Basic phospholipase A2 VRV-PL-VIIIa                               | P59071 ( <i>D. russelii</i> )              | 38.99         | 2                             | 29.99%                 |
| 12       | <i>Drl4</i>           | Basic phospholipase A2 VRV-PL-VIIIa                               | P59071 ( <i>D. russelii</i> )              | 61.72         | 4                             | 3.03%                  |
|          | <i>Drl31</i>          | Moderate to high molecular weight proteins                        | –                                          | –             | –                             | 6.47%                  |

*C. godmani*: *Cerrophidion godmani*; *D. russelii*: *Daboia russelii*; *D. siamensis*: *Daboia siamensis*; *D. acutus*: *Deinagkistrodon acutus*; *E. carinatus*: *Echis carinatus*; *M. lebetina*: *Macrovipera lebetina*; *P. jerdonii*: *Protobothrops jerdonii*.

\*Protein names taken from protein sequence database based on homology match in BLAST and UniProt search.

Peptide sequences and mass/charge ratios of all corresponding proteins are shown in Additional file 3.

#Number of distinct peptides matched to identified proteins.
